# Supplementary material
Source: publisher site journal article supplement (https://www.spandidos-publications.com/3516/downloadSupplementary)

Figure SI. Overexpression and knockdown of CAPN6 expression in rat L6 myoblasts. (A and B) L6 cells were grown and transiently transfected with CAPN6 shRNA, then subjected to RT-qPCR and western blot analysis of CAPN6 mRNA and protein, respectively. (C) L6 cells were grown and transiently transfected with CAPN6 cDNA, then subjected to CAPN6 western blotanalysis. CAPN6, calpain 6.

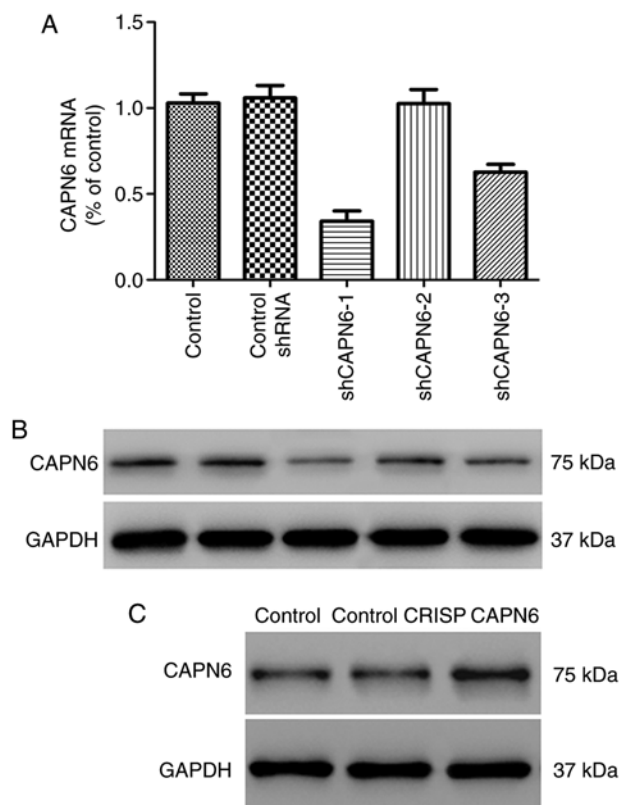

Supplement: Supplementary file 1 [file downloadSupplementary]
